# Supplementary material for: Prognostic Nutritional Index and Major Cardiovascular Events in Patients Undergoing Invasive Coronary Angiography: A Clinical Retrospective Study
Source: MDPI journal article supplement (doi:10.3390/jpm12101679), 2022-10-09
Supplement: s1 [file s1]

**Table S1 Sensitivity analysis of the association between the prognostic nutritional index levels and major cardiovascular events risk**

|                                                                                    | <b>Participants<br/>n</b> | <b>MCE case<br/>(n, %)</b> | <b>Hazard<br/>Ratios</b> | <b>95% Confidence<br/>Intervals</b> | <b><i>P</i></b> |
|------------------------------------------------------------------------------------|---------------------------|----------------------------|--------------------------|-------------------------------------|-----------------|
| <b>Excluding previously incidence of myocardial infarction or stroke</b>           |                           |                            |                          |                                     |                 |
| Crude model                                                                        | 416                       | 35 (8.41%)                 | 2.748                    | 1.410–5.355                         | 0.003           |
| Multi-adjusted model                                                               |                           |                            | 2.659                    | 1.289–5.484                         | 0.008           |
| <b>Excluding reduced left-ventricular ejection fraction (&lt; 50%) in baseline</b> |                           |                            |                          |                                     |                 |
| Crude model                                                                        | 462                       | 42 (9.09%)                 | 2.680                    | 1.452–4.945                         | 0.002           |
| Multi-adjusted model                                                               |                           |                            | 2.704                    | 1.420–5.147                         | 0.002           |
| <b>Excluding missing data of MACE during the follow-up</b>                         |                           |                            |                          |                                     |                 |
| Crude model                                                                        | 442                       | 46 (10.41%)                | 2.614                    | 1.462–4.672                         | 0.001           |
| Multi-adjusted model                                                               |                           |                            | 2.734                    | 1.487–5.026                         | 0.001           |
| <b>Redefining the primary outcome of traditional MCE</b>                           |                           |                            |                          |                                     |                 |
| Crude model                                                                        | 485                       | 41 (8.45%)                 | 2.934                    | 1.552–5.546                         | 0.001           |
| Multi-adjusted model                                                               |                           |                            | 2.991                    | 1.538–5.818                         | 0.001           |
| <b>Setting the low PNI cut-off as the lowest-tertile value (&lt; 48.35)</b>        |                           |                            |                          |                                     |                 |
| Crude model                                                                        | 485                       | 47(9.69%))                 | 1.981                    | 1.118–3.510                         | 0.019           |
| Multi-adjusted model                                                               |                           |                            | 1.947                    | 1.071–3.538                         | 0.029           |

Abbreviations: MCE: major cardiovascular events; PNI: prognostic nutritional index.

Traditional MCE included cardiovascular death, non-fatal myocardial infarction, and non-fatal stroke; Low PNI was correspondingly redefined according to the cut-off value of 45.98, as determined by the receiver operating characteristic curve with the outcome of traditional MCE.

Crude model: Unadjusted.

Multi-adjusted model: Adjusted for gender, age range, lifestyle risk factors (currently smoking, currently drinking), and baseline health status (overweight/obesity, diabetes, hypertension, dyslipidemia, and coronary artery disease).
